# Supplementary material for: SIRT1-SIRT7 Expression in Patients with Lymphoproliferative Disorders Undergoing Hematopoietic Stem Cell Mobilization
Source: MDPI journal article supplement (doi:10.3390/cancers14051213), 2022-02-25
Supplement: s1 [file s1]

**Table S2:** The PCR thermal cycling conditions (T100 Thermal Cycler, BioRad).

|              | Cycling step        | Temperature, °C | Time     | Ramp rate | No of cycles |
|--------------|---------------------|-----------------|----------|-----------|--------------|
| <b>Sirt1</b> | Enzyme activation   | 95              | 10 min   | 2°C/sec   | 1            |
|              | Denaturation        | 94              | 30 sec   |           | 45           |
|              | Annealing/extension | 58              | 1 min    |           | 45           |
|              | Enzyme deactivation | 98              | 10 min   |           | 1            |
|              | Hold                | 4               | Infinite |           | 1            |
| <b>Sirt2</b> | Enzyme activation   | 95              | 10 min   | 2°C/sec   | 1            |
|              | Denaturation        | 94              | 30 sec   |           | 45           |
|              | Annealing/extension | 58              | 1 min    |           | 45           |
|              | Enzyme deactivation | 98              | 10 min   |           | 1            |
|              | Hold                | 4               | Infinite |           | 1            |
| <b>Sirt3</b> | Enzyme activation   | 95              | 10 min   | 2°C/sec   | 1            |
|              | Denaturation        | 94              | 30 sec   |           | 45           |
|              | Annealing/extension | 58              | 1 min    |           | 45           |
|              | Enzyme deactivation | 98              | 10 min   |           | 1            |
|              | Hold                | 4               | Infinite |           | 1            |
| <b>Sirt4</b> | Enzyme activation   | 95              | 10 min   | 2°C/sec   | 1            |
|              | Denaturation        | 94              | 30 sec   |           | 45           |
|              | Annealing/extension | 58              | 1 min    |           | 45           |
|              | Enzyme deactivation | 98              | 10 min   |           | 1            |
|              | Hold                | 4               | Infinite |           | 1            |
| <b>Sirt5</b> | Enzyme activation   | 95              | 10 min   | 2°C/sec   | 1            |
|              | Denaturation        | 94              | 30 sec   |           | 45           |
|              | Annealing/extension | 58              | 1 min    |           | 45           |
|              | Enzyme deactivation | 98              | 10 min   |           | 1            |
|              | Hold                | 4               | Infinite |           | 1            |
| <b>Sirt6</b> | Enzyme activation   | 95              | 10 min   | 1°C/sec   | 1            |
|              | Denaturation        | 94              | 30 sec   |           | 50           |
|              | Annealing/extension | 58              | 1 min    |           | 50           |
|              | Enzyme deactivation | 98              | 10 min   |           | 1            |
|              | Hold                | 4               | Infinite |           | 1            |
| <b>Sirt7</b> | Enzyme activation   | 95              | 10 min   | 2°C/sec   | 1            |
|              | Denaturation        | 94              | 30 sec   |           | 50           |
|              | Annealing/extension | 60              | 1 min    |           | 50           |
|              | Enzyme deactivation | 98              | 10 min   |           | 1            |
|              | Hold                | 4               | Infinite |           | 1            |
