# Supplementary material for: SIRT1-SIRT7 Expression in Patients with Lymphoproliferative Disorders Undergoing Hematopoietic Stem Cell Mobilization
Source: MDPI journal article supplement (doi:10.3390/cancers14051213), 2022-02-25
Supplement: s1 [file s1]

**Table S1. Clinical characteristics of the patients enrolled in the study along with the SIRT1-SIRT7 expression determined in patients on day 0 and day A.**

| Patient number | Sex | Age | Diagnosis | Response<br>1 – CR, 0 – not CR | Number of apheresis | Number of CD34+ cells on<br>day A [x10 <sup>6</sup> /kg] | CD34+/ $\mu$ l peak in<br>peripheral blood on day A | Total number of collected<br>CD34+ cells [x10 <sup>6</sup> /kg] | WBC in peripheral blood<br>at day A [x10 <sup>3</sup> / $\mu$ l] | Sirtuins expression on Day 0 |            |       |       |            |            |       | Sirtuins expression on Day A |         |        |       |        |        |        |
|----------------|-----|-----|-----------|--------------------------------|---------------------|----------------------------------------------------------|-----------------------------------------------------|-----------------------------------------------------------------|------------------------------------------------------------------|------------------------------|------------|-------|-------|------------|------------|-------|------------------------------|---------|--------|-------|--------|--------|--------|
|                |     |     |           |                                |                     |                                                          |                                                     |                                                                 |                                                                  | SIRT1                        | SIRT2      | SIRT3 | SIRT4 | SIRT5      | SIRT6      | SIRT7 | SIRT1                        | SIRT2   | SIRT3  | SIRT4 | SIRT5  | SIRT6  | SIRT7  |
| 1              | M   | 62  | MM        | CR                             | 1                   | 7.1                                                      | 115.4                                               | 7.1                                                             | 20.39                                                            | 199.6<br>4                   | 0          | 0     | 0     | 0          | 0          | 0     | 822.7<br>4                   | 722.61  | 433.31 | 0     | 293.87 | 175.63 | 544.98 |
| 2              | F   | 57  | MM        | CR                             | 3                   | 0.9                                                      | 12.3                                                | 3.05                                                            | 33.36                                                            | 0                            | 134.4<br>3 | 0     | 0     | 58.36      | 0          | 68.63 | 275.3<br>3                   | 1309.42 | 136.83 | 74.65 | 183.7  | 56.24  | 112.46 |
| 3              | M   | 65  | MM        | CR                             | 1                   | 4.97                                                     | 103.2                                               | 4.97                                                            | 23.3                                                             | 0                            | 0          | 71.77 | 0     | 60.54      | 0          | 60.93 | 420.8<br>7                   | 721.23  | 190.5  | 0     | 198.21 | 275.63 | 334.78 |
| 4              | M   | 63  | MM        | CR                             | 4                   | 0.32                                                     | 5.5                                                 | 2.5                                                             | 27.31                                                            | 145.8<br>1                   | 0          | 0     | 0     | 120.2<br>9 | 0          | 68.18 | 302.2<br>6                   | 859.37  | 478.6  | 0     | 446.43 | 351.47 | 455.98 |
| 5              | M   | 48  | MM        | CR                             | 1                   | 7.27                                                     | 94                                                  | 7.27                                                            | 9.4                                                              | 137.6<br>6                   | 75.22      | 74.14 | 0     | 0          | 0          | 139.2 | 561.1<br>6                   | 660.21  | 453.75 | 0     | 206.67 | 557.09 | 559.72 |
| 6              | F   | 51  | MM        | CR                             | 1                   | 4.25                                                     | 56.8                                                | 4.25                                                            | 17.64                                                            | 76.86                        | 0          | 80.44 | 71.86 | 0          | 0          | 81.74 | 1186.<br>49                  | 1369.18 | 503.86 | 0     | 482.01 | 186.97 | 166.57 |
| 7              | M   | 60  | MM        | CR                             | 1                   | 10.8                                                     | 88.8                                                | 10.8                                                            | 14.85                                                            | 0                            | 77.73      | 0     | 0     | 0          | 0          | 75.25 | 0                            | 155.33  | 155.95 | 66.51 | 71.75  | 163.75 | 389.19 |
| 8              | F   | 61  | MM        | not CR<br>(VGPR)               | 2                   | 3.2                                                      | 58.4                                                | 5.58                                                            | 17.04                                                            | 0                            | 190.4      | 0     | 0     | 109.3      | 73.4       | 0     | 827.9<br>4                   | 1615.35 | 678.65 | 58.13 | 342.31 | 261.86 | 389.85 |
| 9              | F   | 65  | MM        | not CR<br>(VGPR)               | 2                   | 1.5                                                      | 25.3                                                | 2.91                                                            | 13.44                                                            | 0                            | 0          | 66.47 | 0     | 68.98      | 0          | 0     | 470.1<br>3                   | 902.26  | 67.18  | 0     | 354.16 | 138.5  | 157.76 |
| 10             | M   | 67  | MM        | not CR<br>(VGPR)               | 6                   | 0.82                                                     | 7.4                                                 | 2.99                                                            | 30.85                                                            | 0                            | 0          | 0     | 0     | 0          | 128.2<br>2 | 0     | 621.9<br>4                   | 1595.95 | 203.97 | 0     | 187.39 | 294.4  | 406.59 |
| 11             | F   | 54  | MM        | not CR<br>(VGPR)               | 2                   | 1.7                                                      | 24.2                                                | 24.3                                                            | 3.16                                                             | 0                            | 242.3<br>9 | 57.34 | 0     | 0          | 0          | 58.32 | 367.9<br>8                   | 357.15  | 176.89 | 0     | 115.87 | 125.95 | 60.39  |
| 12             | F   | 39  | MM        | not CR<br>(VGPR)               | 2                   | 2.7                                                      | 26.5                                                | 5.88                                                            | 7.71                                                             | 64.89                        | 260.6<br>2 | 62.15 | 0     | 0          | 52.96      | 0     | 120.2<br>9                   | 284.83  | 187.3  | 0     | 184.69 | 55.75  | 130.89 |

**Table S1. Clinical characteristics of the patients enrolled in the study along with the SIRT1-SIRT7 expression determined in patients on day 0 and day A.**

|    |   |    |    |                  |   |      |       |           |       |            |            |        |   |       |       |            |            |         |        |       |        |        |         |
|----|---|----|----|------------------|---|------|-------|-----------|-------|------------|------------|--------|---|-------|-------|------------|------------|---------|--------|-------|--------|--------|---------|
| 13 | F | 51 | MM | not CR<br>(VGPR) | 1 | 4.52 | 132.2 | 4.52      | 26.28 | 126.2<br>9 | 69.36      | 72.72  | 0 | 0     | 0     | 0          | 312.7<br>1 | 330.27  | 285.18 | 0     | 177.68 | 212.48 | 260.82  |
| 14 | F | 57 | MM | not CR<br>(VGPR) | 1 | 4.77 | 44.3  | 4.77      | 14.48 | 128.6<br>6 | 63.97      | 62.27  | 0 | 0     | 0     | 0          | 412.2<br>6 | 897.13  | 136.47 | 0     | 329.9  | 341.77 | 669.45  |
| 15 | M | 65 | MM | not CR<br>(VGPR) | 2 | 4.59 | 59.3  | 11.5<br>8 | 9.83  | 237.6<br>8 | 128.6<br>9 | 0      | 0 | 0     | 55.48 | 79.37      | 122.6      | 576.36  | 66.85  | 0     | 689.03 | 208.18 | 367.45  |
| 16 | F | 62 | MM | not CR<br>(VGPR) | 1 | 8.7  | 109.7 | 8.7       | 26.63 | 66.65      | 0          | 0      | 0 | 0     | 0     | 206.9<br>3 | 117.5<br>2 | 250.3   | 0      | 0     | 188.08 | 0      | 0       |
| 17 | F | 69 | MM | not CR<br>(VGPR) | 1 | 6.1  | 91.2  | 6.1       | 20.78 | 0          | 0          | 0      | 0 | 59.14 | 0     | 0          | 293.3<br>3 | 1157.79 | 471.18 | 0     | 64.09  | 218.69 | 436.03  |
| 18 | F | 42 | MM | not CR<br>(VGPR) | 3 | 1.15 | 11.34 | 4.5       | 6.75  | 0          | 109.8<br>5 | 195.53 | 0 | 0     | 0     | 0          | 73.3       | 67.19   | 0      | 0     | 0      | 0      | 0       |
| 19 | M | 63 | MM | not CR<br>(VGPR) | 1 | 13.5 | 179.3 | 13.5      | 17.19 | 122.6<br>2 | 153.6<br>4 | 68.78  | 0 | 0     | 69.7  | 0          | 61.85      | 1050.31 | 143.95 | 67.12 | 418.61 | 631.5  | 280.81  |
| 20 | M | 50 | MM | not CR<br>(VGPR) | 2 | 2.49 | 89.9  | 5.29      | 18.82 | 259.6<br>8 | 203.5      | 0      | 0 | 0     | 68.08 | 0          | 298.7<br>9 | 1147.41 | 0      | 0     | 381.85 | 611.3  | 468.82  |
| 21 | F | 51 | MM | not CR<br>(VGPR) | 4 | 0.3  | 5.1   | 2.66      | 21.99 | 0          | 181.3<br>2 | 0      | 0 | 0     | 68.69 | 0          | 204.8<br>4 | 653.08  | 73.32  | 0     | 0      | 226.99 | 0       |
| 22 | M | 60 | MM | not CR<br>(VGPR) | 1 | 3.5  | 51.9  | 3.5       | 16.56 | 71.79      | 217.4<br>6 | 0      | 0 | 0     | 0     | 0          | 369.8<br>2 | 871.5   | 0      | 0     | 288.63 | 652    | 441.44  |
| 23 | M | 60 | MM | not CR<br>(VGPR) | 1 | 20.8 | 415.4 | 20.8      | 14.45 | 76.92      | 0          | 163.46 | 0 | 58.96 | 0     | 131.9<br>9 | 958.9<br>5 | 876.77  | 311.81 | 0     | 509.08 | 508.05 | 1445.53 |
| 24 | M | 55 | MM | not CR<br>(VGPR) | 1 | 5.69 | 143.5 | 5.69      | 10.93 | 136.3<br>9 | 82.5       | 0      | 0 | 0     | 58.72 | 0          | 220.3<br>8 | 463.83  | 0      | 0     | 327.01 | 465.74 | 349.37  |
| 25 | M | 50 | MM | not CR<br>(VGPR) | 1 | 21   | 449.5 | 21        | 9.79  | 394.5<br>7 | 72.5       | 256.72 | 0 | 0     | 56.39 | 0          | 263.3<br>9 | 385.28  | 132.43 | 0     | 239.33 | 224.94 | 285.1   |
| 26 | F | 63 | MM | not CR<br>(VGPR) | 4 | 0.6  | 4.8   | 2.2       | 14.35 | 0          | 0          | 0      | 0 | 0     | 0     | 59.59      | 176.1      | 825.75  | 0      | 0     | 128.66 | 85.44  | 134.6   |
| 27 | F | 62 | MM | not CR<br>(VGPR) | 4 | 0.78 | 11.9  | 3.1       | 15.65 | 229.9<br>9 | 76.41      | 0      | 0 | 0     | 73.49 | 0          | 527.8<br>2 | 436.63  | 240.91 | 0     | 333.19 | 226.95 | 236.28  |

**Table S1. Clinical characteristics of the patients enrolled in the study along with the SIRT1-SIRT7 expression determined in patients on day 0 and day A.**

|    |   |    |             |               |   |      |       |      |       |            |            |        |   |            |            |            |              |         |              |        |         |         |         |
|----|---|----|-------------|---------------|---|------|-------|------|-------|------------|------------|--------|---|------------|------------|------------|--------------|---------|--------------|--------|---------|---------|---------|
| 28 | F | 60 | MM          | not CR (VGPR) | 3 | 0.46 | 7.59  | 3.6  | 22.33 | 0          | 77.2       | 80.65  | 0 | 81.77      | 0          | 62.16      | 403.4<br>1   | 772.42  | 166.61       | 0      | 73.96   | 325.64  | 145.1   |
| 29 | M | 66 | MM          | not CR (VGPR) | 1 | 35.6 | 581   | 35.6 | 40.86 | 69.87      | 319.2<br>9 | 68.18  | 0 | 0          | 68.24      | 0          | 1674<br>8.56 | 4787.37 | 14167.3<br>5 | 134.96 | 875.46  | 1951.47 | 4711.99 |
| 30 | F | 62 | MM          | not CR (VGPR) | 1 | 7.5  | 130.4 | 7.5  | 47.42 | 210.9<br>8 | 299.1<br>2 | 149.56 | 0 | 71.14      | 240.2<br>2 | 142.3      | 1237.<br>4   | 2378.59 | 644.96       | 0      | 1051.72 | 799.54  | 1415.21 |
| 31 | F | 60 | MM          | not CR (VGPR) | 1 | 5.3  | 71.5  | 5.3  | 19.44 | 79.18      | 299.6<br>1 | 0      | 0 | 65.89      | 0          | 145.1<br>4 | 1789.<br>7   | 738.86  | 748.4        | 0      | 255.37  | 757.53  | 1136.45 |
| 32 | F | 55 | MM          | not CR (PR)   | 2 | 0.9  | 14.3  | 3.42 | 4.13  | 0          | 54.05      | 122.8  | 0 | 0          | 0          | 0          | 64.75        | 322.95  | 0            | 0      | 129.75  | 177.07  | 258.22  |
| 33 | M | 40 | MM          | not CR (PR)   | 1 | 4.7  | 62.6  | 4.7  | 12.6  | 0          | 70.03      | 0      | 0 | 133.8<br>1 | 64.42      | 0          | 553.8<br>3   | 573.97  | 329.21       | 0      | 137.72  | 477.48  | 138.23  |
| 34 | M | 56 | MM          | not CR (PR)   | 2 | 2.62 | 27.6  | 4.46 | 28.77 | 178.9<br>3 | 193.3<br>3 | 142.85 | 0 | 0          | 57.96      | 61.82      | 2916.<br>9   | 850.79  | 2841.28      | 0      | 247.87  | 325.96  | 2336.21 |
| 35 | M | 60 | MM          | not CR (PR)   | 1 | 6.47 | 153.6 | 6.47 | 2.68  | 66.13      | 359.5      | 59.02  | 0 | 255.6<br>9 | 109.0<br>5 | 64.19      | 0            | 464.7   | 0            | 0      | 181.9   | 0       | 237.52  |
| 36 | M | 44 | MM          | not CR (PR)   | 2 | 1.79 | 16.6  | 3.02 | 4.69  | 0          | 168.0<br>7 | 57.37  | 0 | 0          | 0          | 0          | 55.59        | 560.55  | 119.63       | 0      | 60.27   | 0       | 0       |
| 37 | M | 63 | MM          | not CR (PR)   | 1 | 5.8  | 95.6  | 5.8  | 3.4   | 137.7<br>4 | 139.9<br>5 | 85.37  | 0 | 0          | 53.86      | 0          | 84.62        | 65.6    | 0            | 0      | 0       | 68.24   | 117.28  |
| 38 | M | 64 | MM          | not CR (PR)   | 2 | 1.2  | 18    | 8.15 | 8.76  | 0          | 0          | 0      | 0 | 0          | 0          | 0          | 455.9<br>8   | 685.24  | 139.21       | 0      | 0       | 0       | 0       |
| 39 | M | 36 | MM          | not CR (PR)   | 1 | 8.2  | 84.2  | 8.2  | 6.16  | 70.1       | 242.5<br>2 | 59.14  | 0 | 0          | 0          | 141.1<br>6 | 368.4<br>6   | 1170.16 | 59.86        | 0      | 284.75  | 344.86  | 212.35  |
| 40 | M | 54 | NHL (MCL)   | CR            | 3 | 1.14 | 24.5  | 3.36 | 21.89 | 0          | 75.04      | 0      | 0 | 63.23      | 0          | 0          | 568.3<br>4   | 1493.02 | 304.77       | 0      | 555.13  | 494.53  | 345.13  |
| 41 | F | 60 | NHL (MCL)   | CR            | 2 | 6.7  | 156.9 | 10.6 | 30.34 | 0          | 0          | 0      | 0 | 0          | 0          | 0          | 1730.<br>92  | 1761.87 | 919.59       | 0      | 830.8   | 816.42  | 1040.18 |
| 42 | M | 53 | NHL (DLBCL) | CR            | 1 | 3.9  | 79.4  | 3.9  | 14.34 | 108.0<br>7 | 313.8      | 58.73  | 0 | 169.2<br>9 | 65.87      | 65.16      | 251.0<br>5   | 568.46  | 60.42        | 0      | 182.36  | 251.52  | 415.32  |

**Table S1. Clinical characteristics of the patients enrolled in the study along with the SIRT1-SIRT7 expression determined in patients on day 0 and day A.**

|    |   |    |                |                |   |      |       |      |       |            |            |        |   |            |            |            |             |         |         |       |         |         |         |
|----|---|----|----------------|----------------|---|------|-------|------|-------|------------|------------|--------|---|------------|------------|------------|-------------|---------|---------|-------|---------|---------|---------|
| 43 | F | 62 | NHL<br>(DLBCL) | not CR<br>(PR) | 2 | 2.6  | 46.5  | 4.42 | 37.85 | 262.8<br>4 | 0          | 77.96  | 0 | 124.7<br>6 | 132.1      | 0          | 1056.<br>6  | 2223.17 | 386.11  | 0     | 466.04  | 1220.01 | 650.56  |
| 44 | M | 59 | NHL<br>(DLBCL) | not CR<br>(PR) | 2 | 1.68 | 27.18 | 4.98 | 16.78 | 71.25      | 66.95      | 0      | 0 | 0          | 61.13      | 0          | 202.5<br>1  | 360.01  | 82.18   | 0     | 326.67  | 176.69  | 74.21   |
| 45 | F | 42 | NHL<br>(HSTL)  | not CR<br>(PR) | 3 | 1.85 | 21.1  | 3.59 | 40.5  | 295.7<br>2 | 425.6<br>5 | 0      | 0 | 121.7      | 106.1<br>6 | 149.3      | 198.6<br>9  | 1260.5  | 66.57   | 0     | 118.6   | 237.47  | 262.37  |
| 46 | F | 60 | NHL<br>(ALCL)  | not CR<br>(PR) | 2 | 1.65 | 29.6  | 5.43 | 11.25 | 178.8<br>3 | 132.2<br>8 | 120.69 | 0 | 0          | 0          | 110.2<br>5 | 124.0<br>3  | 521.84  | 128.99  | 0     | 57.17   | 51.56   | 62.81   |
| 47 | F | 38 | HL             | CR             | 2 | 2.8  | 29.5  | 4.33 | 29.8  | 0          | 222.6<br>9 | 0      | 0 | 66.01      | 0          | 0          | 464.8<br>4  | 1717.12 | 290.02  | 0     | 503.28  | 546.41  | 1167.81 |
| 48 | M | 49 | HL             | not CR<br>(PR) | 2 | 2.26 | 22.5  | 5.16 | 33.16 | 0          | 127.7<br>7 | 0      | 0 | 136.2<br>4 | 58.04      | 0          | 142.2<br>4  | 128.31  | 129.51  | 0     | 199.23  | 260.79  | 59.25   |
| 49 | F | 34 | HL             | not CR<br>(PR) | 2 | 2.3  | 50.5  | 5.9  | 8.08  | 62.75      | 0          | 73.39  | 0 | 0          | 79.59      | 0          | 649.4<br>4  | 597.69  | 439.24  | 80.66 | 310.11  | 785.43  | 248.6   |
| 50 | M | 21 | HL             | not CR<br>(PR) | 1 | 12.2 | 205.5 | 12.2 | 42.73 | 67.22      | 147.5<br>5 | 0      | 0 | 0          | 116.6<br>8 | 65.45      | 2215.<br>45 | 3620.83 | 1676.18 | 75.53 | 1473.39 | 2404.06 | 2020.54 |
