# Supplementary figures and images for: SIRT1-SIRT7 Expression in Patients with Lymphoproliferative Disorders Undergoing Hematopoietic Stem Cell Mobilization
Source: MDPI journal article supplement (doi:10.3390/cancers14051213), 2022-02-25

(a)

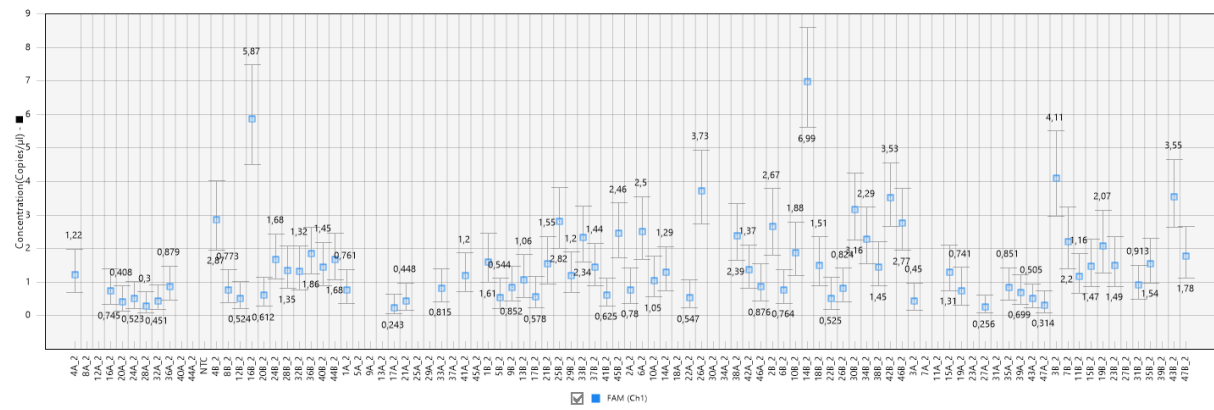

(b)

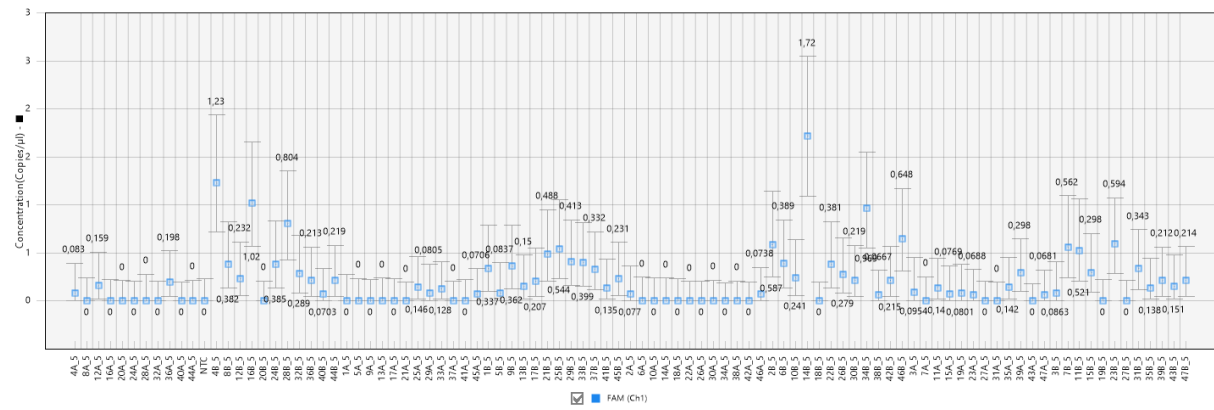

**Figure S1:** mRNA level [copies/μl] of the (a) SIRT2 and (b) SIRT5.

Supplement: s1 [file s1]
